# Supplementary material for: IFNγ Is Critical for CAR T Cell–Mediated Myeloid Activation and Induction of Endogenous Immunity
Source: Oxford University Press journal article supplement (doi:10.1158/2159-8290.cd-20-1661), 2021-04-09
Supplement: 21598290cd201661-sup-255535_2_supp_7025532_qqvy2y.docx [file 21598290cd201661-sup-255535_2_supp_7025532_qqvy2y.docx]

**Supplementary Table S1: List of antibodies for flow cytometry, immunohistochemistry and immunofluorescence.**
